## The effect of APOBEC3B deaminase on double-stranded DNA

Joseph Chapman<sup>†</sup>, Michael Custance<sup>†</sup>, Birong Shen\*, Anthony V. Furano\*

Section on Genomic Structure and Function, Laboratory of Cell and Molecular Biology, National Institute of Diabetes and Digestive and Kidney Diseases, National Institutes of Health, Bethesda, Maryland, 20892, United States

<sup>†</sup>Contributed equally to this work

\*Correspondence should be addressed to A.V.F. ([anthonyf@helix.nih.gov](mailto:anthonyf@helix.nih.gov)) or B.S. ([birong.shen@nih.gov](mailto:birong.shen@nih.gov))

The authors would like to withdraw the current version of their paper, "The effect of APOBEC3B deaminase on double-stranded DNA" by Joseph Chapman, Michael Custance, Birong Shen, Anthony V. Furano (doi:<https://doi.org/10.1101/750877>). We discovered an issue with one of the reagents for one of the determinations that we presented. We are now preparing this reagent again and will re-submit our paper when we have repeated our analysis. Therefore, the authors do not wish this work to be cited as reference for the project. If you have any questions, please contact the corresponding author.
